# Supplementary material for: High-performance electromagnetic wave absorbing composites prepared by one-step transformation of Fe3+mediated egg-box structure of seaweed
Source: Royal Society of Chemistry journal article supplement (doi:10.1039/c6ra22721j), 2016-01-01
Supplement: c6ra22721j1.pdf [file c6ra22721j1.pdf]

High-performance electromagnetic wave absorbing composites  
prepared by one-step transformation of Fe<sup>3+</sup> mediated egg-box  
structure of seaweed

Nan Zhou, Qing-Da An\*, Wei Zheng, Zuo-Yi Xiao, Shang-Ru Zhai\*

*Faculty of Light Industry and Chemical Engineering, Dalian Polytechnic University,*

*Dalian 116034*

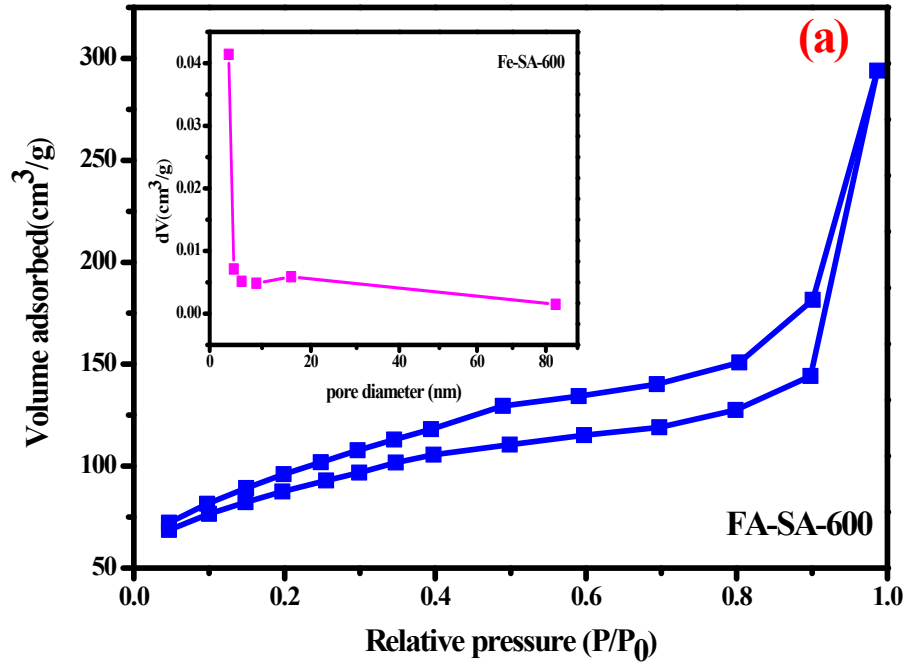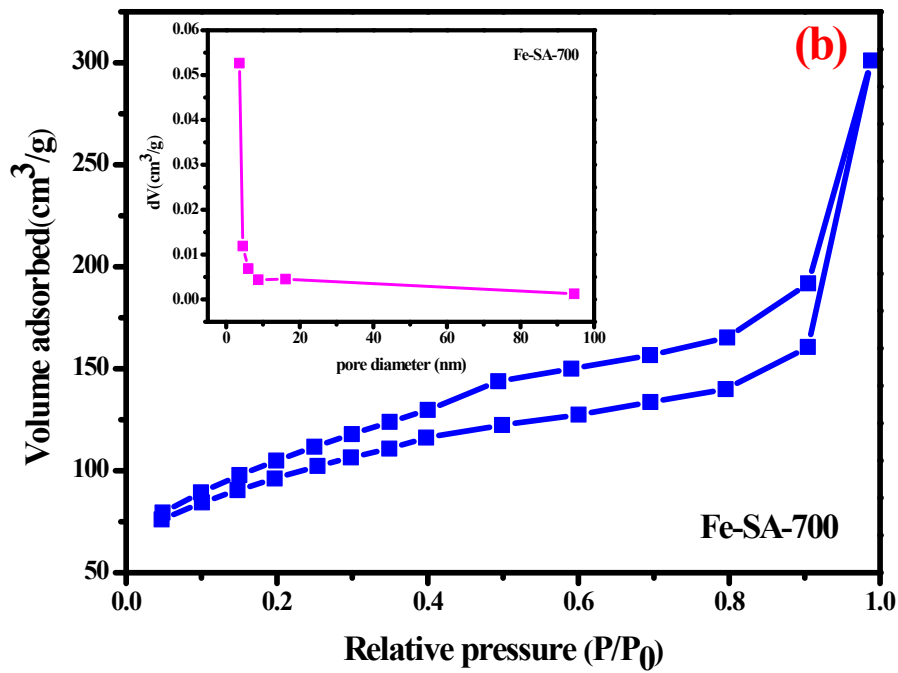

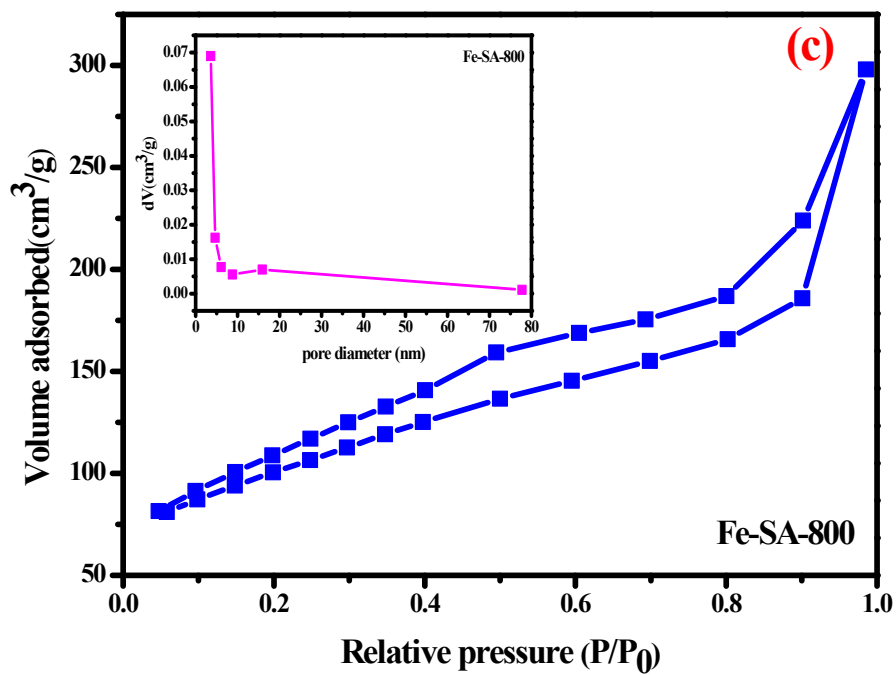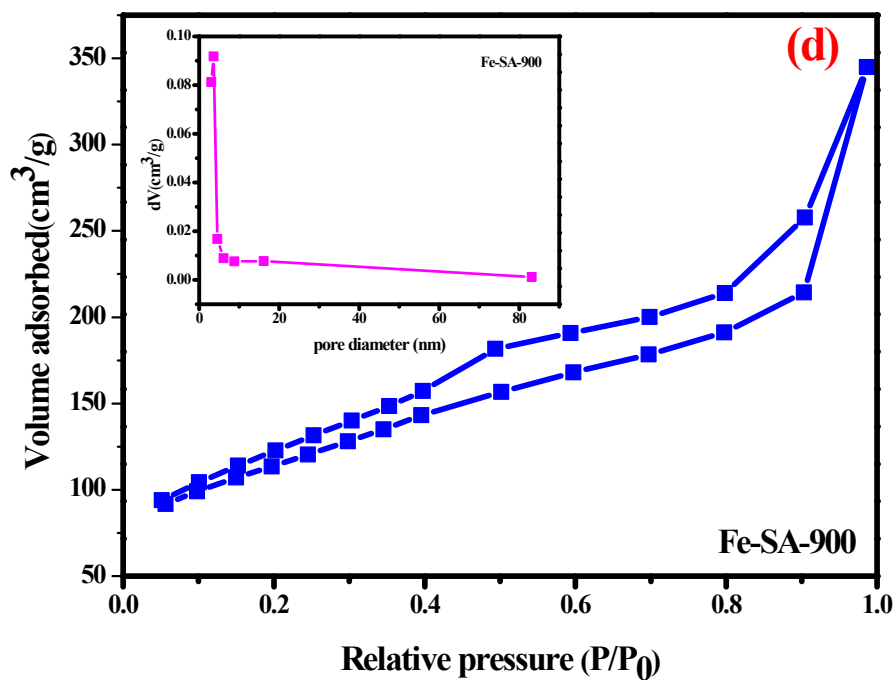

Fig. S1 The BET of (a)Fe-SA-600, (b)Fe-SA-700, (c)Fe-SA-800, and (d) Fe-SA-900.
